# Supplementary material for: Dosing of chemotherapy in obese and cachectic patients: results of a national survey
Source: Springer Nature journal article supplement (doi:10.1007/s11096-014-9942-9), 2014-04-26
Supplement: MOESM1 [file 16452728]

**Electronic Supplementary Material 1:**

**SURVEY “CHEMOTHERAPY DOSING IN EXTREME WEIGHT PATIENTS (obese and cachectic)”**

**DEMOGRAPHIC HOSPITAL INFORMATION**

**1. - Number of beds:**

≤ 99   100-199  200-499  ≥ 500

**2. - Functional dependency**:

Public Health System

Other public services (administration, prision etc…)

Private

Privately owned center concerted by the Public Health System

**3. - Hospital Scope:**

General

Cancer

Regional

Other: _____________________________________________

**4. - Medical specialties or units available (select one or more options):**

Oncology

Hematology

Hematopoietic Stem Cell Transplant Unit

**5. - Mean number of chemotherapy treatments prepared/month:** ________

**6. - Number of ongoing clinical trials/year:** __________

**IMPORTANT**: in case of different dosing strategies carried out in the same hospital depending on the prescribing physician or the medical team, please fulfill as many surveys as strategies performed. Please specified bellow the reason of completing more than one survey:

Varies depending on the unit.  Varies depending on the physician

**Indicate what corresponds to this survey:**

Physician preference  Oncology  Hematology

**CHEMOTHERAPY TREATMENT ON CLINICAL PRACTICES**

**GENERAL CONSIDERATIONS**

**1. - For those drugs that require dose adjustments in renal failure, is creatinine clearance (ClCr) calculated in each chemotherapy cycle?**

Yes

No, only if creatinine changes a particular value.

Please specify the value: ________________________

Only if the creatinine value is > 1mg/dL

**2. - Which formula is used to calculate adjusted body weight at your hospital?**

James method

Hume method

Other. Please specify:__________________________

**3. - What formula is used to calculate body surface area at your hospital?**

Mosteller formula

DuBois DuBois formula

Haycock formula

Gehan and George formula

Boyd formula

Other. Please specify**:**____________________________

**4. - Is any dose adjustment performed in patients amputees when calculating the body surface area?**

Yes

No

**DOSING IN OBESE PATIENTS**

**5. - Do you use the body mass index (BMI, Kg/m2) to determine whether a patient is obese?**

No  Yes

If the answer is yes, please respond to the following question:

**6. - From which body mass index (BMI, Kg/m2) do you consider a patient to be obese?**

≥ 25-29.9  30-32.9  ≥ 33-35  ≥ 35  None

**7. - From which body mass index do you calculate adjusted body weight?**

≥ 25-29.9  30-32.9  ≥ 33-35  ≥ 35  None

**8. - Do you limit the body surface area to a maximum value?**

No

Yes. Specify the maximum value of BSA**:** ___________

**9. - Do you have a maximum value of body weight?**

No

Yes. Specify the maximum value of body weight**:** ___________

**10. - When calculating the carboplatin dose with Calvert’s formula, do you limit creatinine clearance (ClCr) to a certain value?**

Yes. Please specify the maximum value of ClCr= ______________

No

We do not use the Calvert‘s formula

**11. - Which method/s do you use to estimate ClCr?**

Cockcroft-Gault equation

Salazar formula

Enzymatic method of Jaffé

MDRD-IDMS formula

24-hour urine collection method

Other. Please specify:_________________________

**12. – When calculating creatinine clearance, do you perform any correction on body weight in obese patients?**

Yes  No

If the answer is yes, please indicate the type of correction:

Total body weight

Adjusted body weight

Ideal body weight

.

- ***Chemotherapy dosing based on BODY WEIGHT***

**13. - How is chemotherapy dosage based on body weight, dosed in obese* patients at your hospital?**

Using total body weight in each cycle

Using adjusted body weight: please indicate the formula used:___________

Using ideal body weight: please indicate the formula used: _____________

* consider obese patients those with BMI higher or equal than the BMI specified in question 5.

**14. - Do you use the same criteria for hydrophilic or lipophilic drugs?**

Yes

No. In this case, please indicate the criteria use:

- Hydrophilic drugs:  actual body weight  adjusted body weight

ideal body weight

- Lipophilic drugs:  actual body weight  adjusted body weight

ideal body weight

**15. - Which body weight is used to dose chemotherapy in *curative* treatment intent in obese patients?**

Total body weight

Adjusted body weight

Ideal body weight

Other: _______________________________________

**16. - Which body weight is used to dose chemotherapy in *palliative* treatment intent in obese patients?**

Total body weight

Adjusted body weight

Ideal body weight

Other: ______________________________________

- ***Chemotherapy dosing based on BODY SURFACE AREA***

**17. - How is chemotherapy based on body surface area dosed in obese patients at your hospitals?**

Body surface area (BSA) calculated using total body weight (total BSA)

BSA calculated using ideal body weight (ideal BSA)

BSA calculated using adjusted body weight (adjusted BSA)

Capping BSA at a maximum value. Please specify the value: _________

**18. -** **Do you use the same criteria for hydrophilic or lipophilic drugs?**

Yes

No. In this case, please indicate the criteria used:

- Hydrophilic drugs:  total BSA  adjusted BSA  ideal BSA
- Lipophilic drugs:  total BSA  adjusted BSA  ideal BSA

**19. - Which body surface area is used to dose chemotherapy in obese patients in *curative* treatment intent?**

total BSA

ideal BSA

adjusted BSA

Other: ______________________________________

**20. - Which body surface area is used to dose chemotherapy in obese patients in *palliative* treatment intent?**

total BSA

ideal BSA

adjusted BSA

Other: _______________________________________

**DOSING IN CACHECTIC PATIENTS**

**1. - Do you limit the body surface area to a minimum value?**

No

Yes. Please specify the minimum value of BSA**: ___________**

**2. - Do you use a minimum value of body weight?**

No

Yes. Please specify the minimum value of body weight**: ____________**

**3. - Do you use the body mass index (BMI, Kg/m2) to determine whether a patient is cachectic?**

No  Yes

If the answer is yes, please respond to the following question:

**4. - From which body mass index (BMI, Kg/m2) do you consider a patient to be cachectic?**

≤16  16-16.99  17-18

**5. - When calculating the carboplatin dose with Calvert’s formula, do you limit creatinine clearance (ClCr) to a certain value?**

Yes. Please specify the maximum value of ClCr= **_____________**

No

We do not use the Calvert’s formula

**6. - Which method/s do you use to estimate ClCr?**

Cockcroft-Gault equation

Salazar formula

Enzymatic method of Jaffé

MDRD-IDMS formula

Creatinine clearance from 24-hour urine collection method

Other. Please specify: ___________________________

**7. - When calculating creatinine clearance, do you perform any correction on body weight in cachectic patients?**

Yes  No

If the answer is yes, please indicate the type of correction:

Total body weight

Adjusted body weight

Ideal body weight

- ***Chemotherapy dosing based on BODY WEIGHT***

**8. - Do you cap body weight to a minimum value?**

No

Yes. Please indicate the value: ___________________

**9. - How is chemotherapy dosage based on body weight, dosed in cachectic patients at your hospital?**

Using total body weight in each cycle

Using adjusted body weight: please indicate the formula used: **___________**

Using ideal body weight: please indicate the formula used: **­­­­­­______________**

**10. - Do you use the same criteria for hydrophilic or lipophilic drugs?**

Yes

No. In this case, please indicate the criteria used:

- Hydrophilic drugs:  total body weight  adjusted body weight

ideal body weight

- Lipophilic drugs:  total body weight  adjusted body weight

ideal body weight

**11. - Which body weight is used for chemotherapy dosing in cachectic patients in *curative* treatments intent?**

Total body weight

Adjusted body weight

Ideal body weight

Other: _____________________________________________________

**12. - Which body weight is used for chemotherapy dosing in cachectic patients in *palliative* treatments intent?**

Total body weight

Adjusted body weight

Ideal body weight

Other: ______________________________________________________

- ***Chemotherapy dosing based on BODY SURFACE AREA***

**13. - How is chemotherapy based on body surface area dosed in cachectic patients at your hospitals?**

Body surface area (BSA) calculated using total body weight (total BSA)

BSA calculated using ideal body weight (ideal BSA)

BSA calculated using adjusted body weight (adjusted BSA)

Capping BSA at a minimum value. Please specify the value: ____________

**14. - Do you use the same criteria for hydrophilic or lipophilic drugs?**

Yes

No. In this case, please indicate the criteria use:

- Hydrophilic drugs:  total BSA  adjusted BSA  ideal BSA
- Lipophilic drugs:  total BSA  adjusted BSA  ideal BSA

**15. - Which body surface area is used to dose chemotherapy in cachectic patients in *curative* treatments intent?**

total BSA

ideal BSA

adjusted BSA

Other:____________________________________________________

**16. - Which body surface area is used to dose chemotherapy in cachectic patients in *palliative* treatments intent?**

total BSA

ideal BSA

adjusted BSA

Other:____________________________________________________

**CHEMOTHERAPY DOSING IN CLINICAL TRIALS**

**1. - In clinical trials treatments:**

We use the same criteria as in usual practice

We consider the criteria of each clinical trial individually

We use a general approach for all clinical trials.

Please indicate the maximum BSA consider: _____________________

Other:____________________________________________________

**Bibliography:**

(1) Felici A, Verweij J, Sparreboom A. Dosing strategies for anticancer drugs: the good, the bad and body-surface area. Eur J Cancer 2002 9; 38(13):1677-1684.

(2) Gao B, Klumpen H, Gurney H. Dose calculation of anticancer drugs. Expert Opin Drug Metab Toxicol 2008 10/01; 2011/02; 4(10):1307-1319.

(3) Greenman CG, Jagielski CH, Griggs JJ. Breast cancer adjuvant chemotherapy dosing in obese patients. Cancer 2008; 112(10):2159-2165.

(4) Hunter RJ, Navo MA, Thaker PH, Bodurka DC, Wolf JK, Smith JA. Dosing chemotherapy in obese patients: Actual versus assigned body surface area (BSA). Cancer Treat Rev 2009 2;35(1):69-78.

(5) Kaestner SA, Sewell GJ. Chemotherapy Dosing Part I: Scientific Basis for Current Practice and Use of Body Surface Area. Clin Oncol 2007 2;19(1):23-37.

(6) Schwartz J, Toste B, Dizon DS. Chemotherapy toxicity in gynecologic cancer patients with a body surface area (BSA) > 2 m2. Gynecol Oncol 2009 7; 114(1):53-56.

(7) [Griggs JJ](http://www.ncbi.nlm.nih.gov/pubmed?term=%22Griggs%20JJ%22%5BAuthor%5D), [Mangu PB](http://www.ncbi.nlm.nih.gov/pubmed?term=%22Mangu%20PB%22%5BAuthor%5D), [Anderson H](http://www.ncbi.nlm.nih.gov/pubmed?term=%22Anderson%20H%22%5BAuthor%5D), et al. Appropriate Chemotherapy Dosing for Obese Adult Patients With Cancer: American Society of Clinical Oncology Clinical Practice Guideline. [J Clin Oncol.](http://www.ncbi.nlm.nih.gov/pubmed/22473167##) 2012 Apr 2.
